# Supplementary material for: Single-cell RNA sequencing reveals gene expression signatures of breast cancer-associated endothelial cells
Source: PubMed Central journal article supplement (PMC5834272; doi:10.18632/oncotarget.23760), 2017-12-29
Supplement: oncotarget-09-10945-s001.pdf [file oncotarget-09-10945-s001.pdf]

# Single-cell RNA sequencing reveals gene expression signatures of breast cancer-associated endothelial cells

## SUPPLEMENTARY MATERIALS

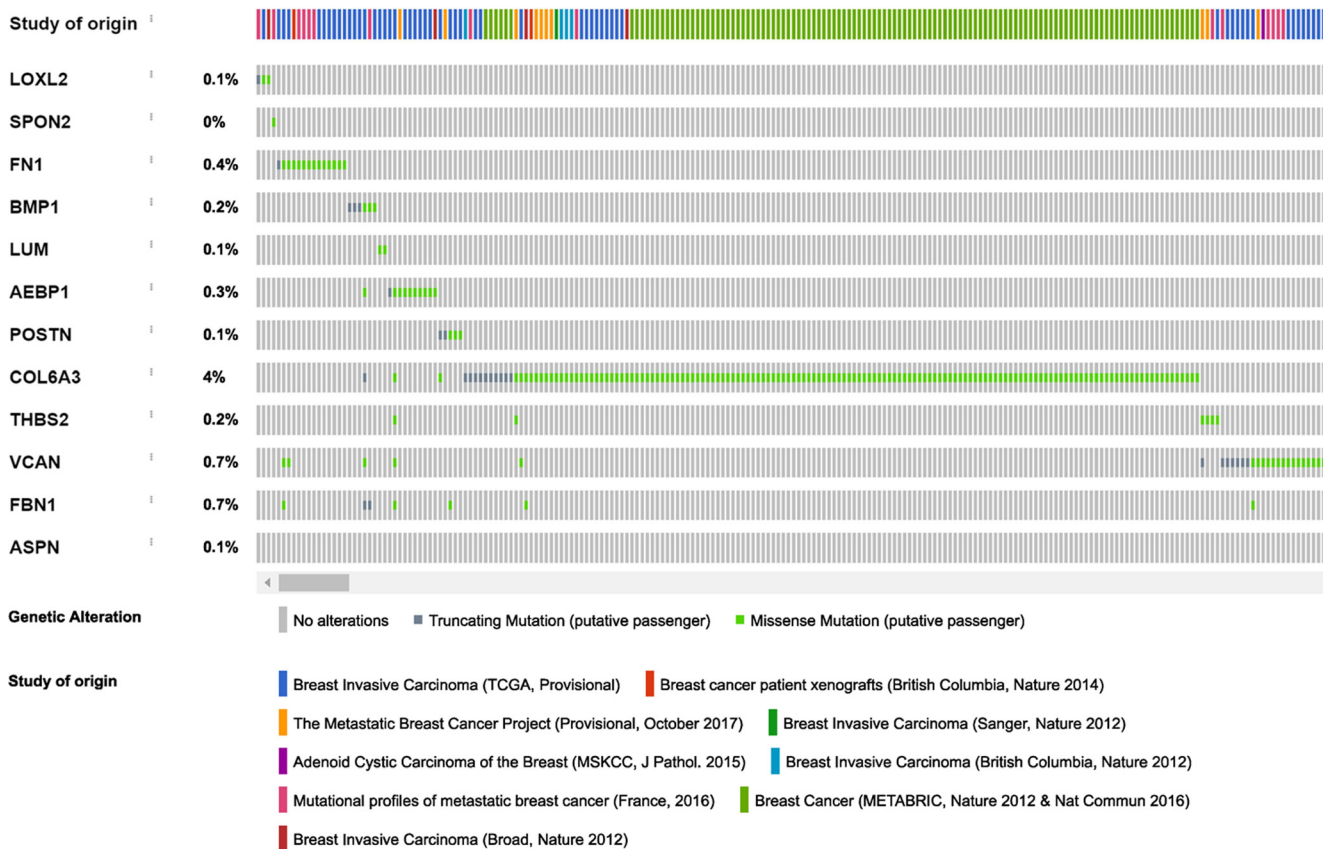

**Supplementary Figure 1: *In silico* analysis of breast cancer databases.** TCGA analysis for ECM-related gene expression via the cBioPortal database.
